# Supplementary material for: Histone H3F3A and HIST1H3B K27M mutations define two subgroups of diffuse intrinsic pontine gliomas with different prognosis and phenotypes
Source: Springer Nature journal article supplement (doi:10.1007/s00401-015-1478-0), 2015-09-23
Supplement: MOESM1 [file 8404974]

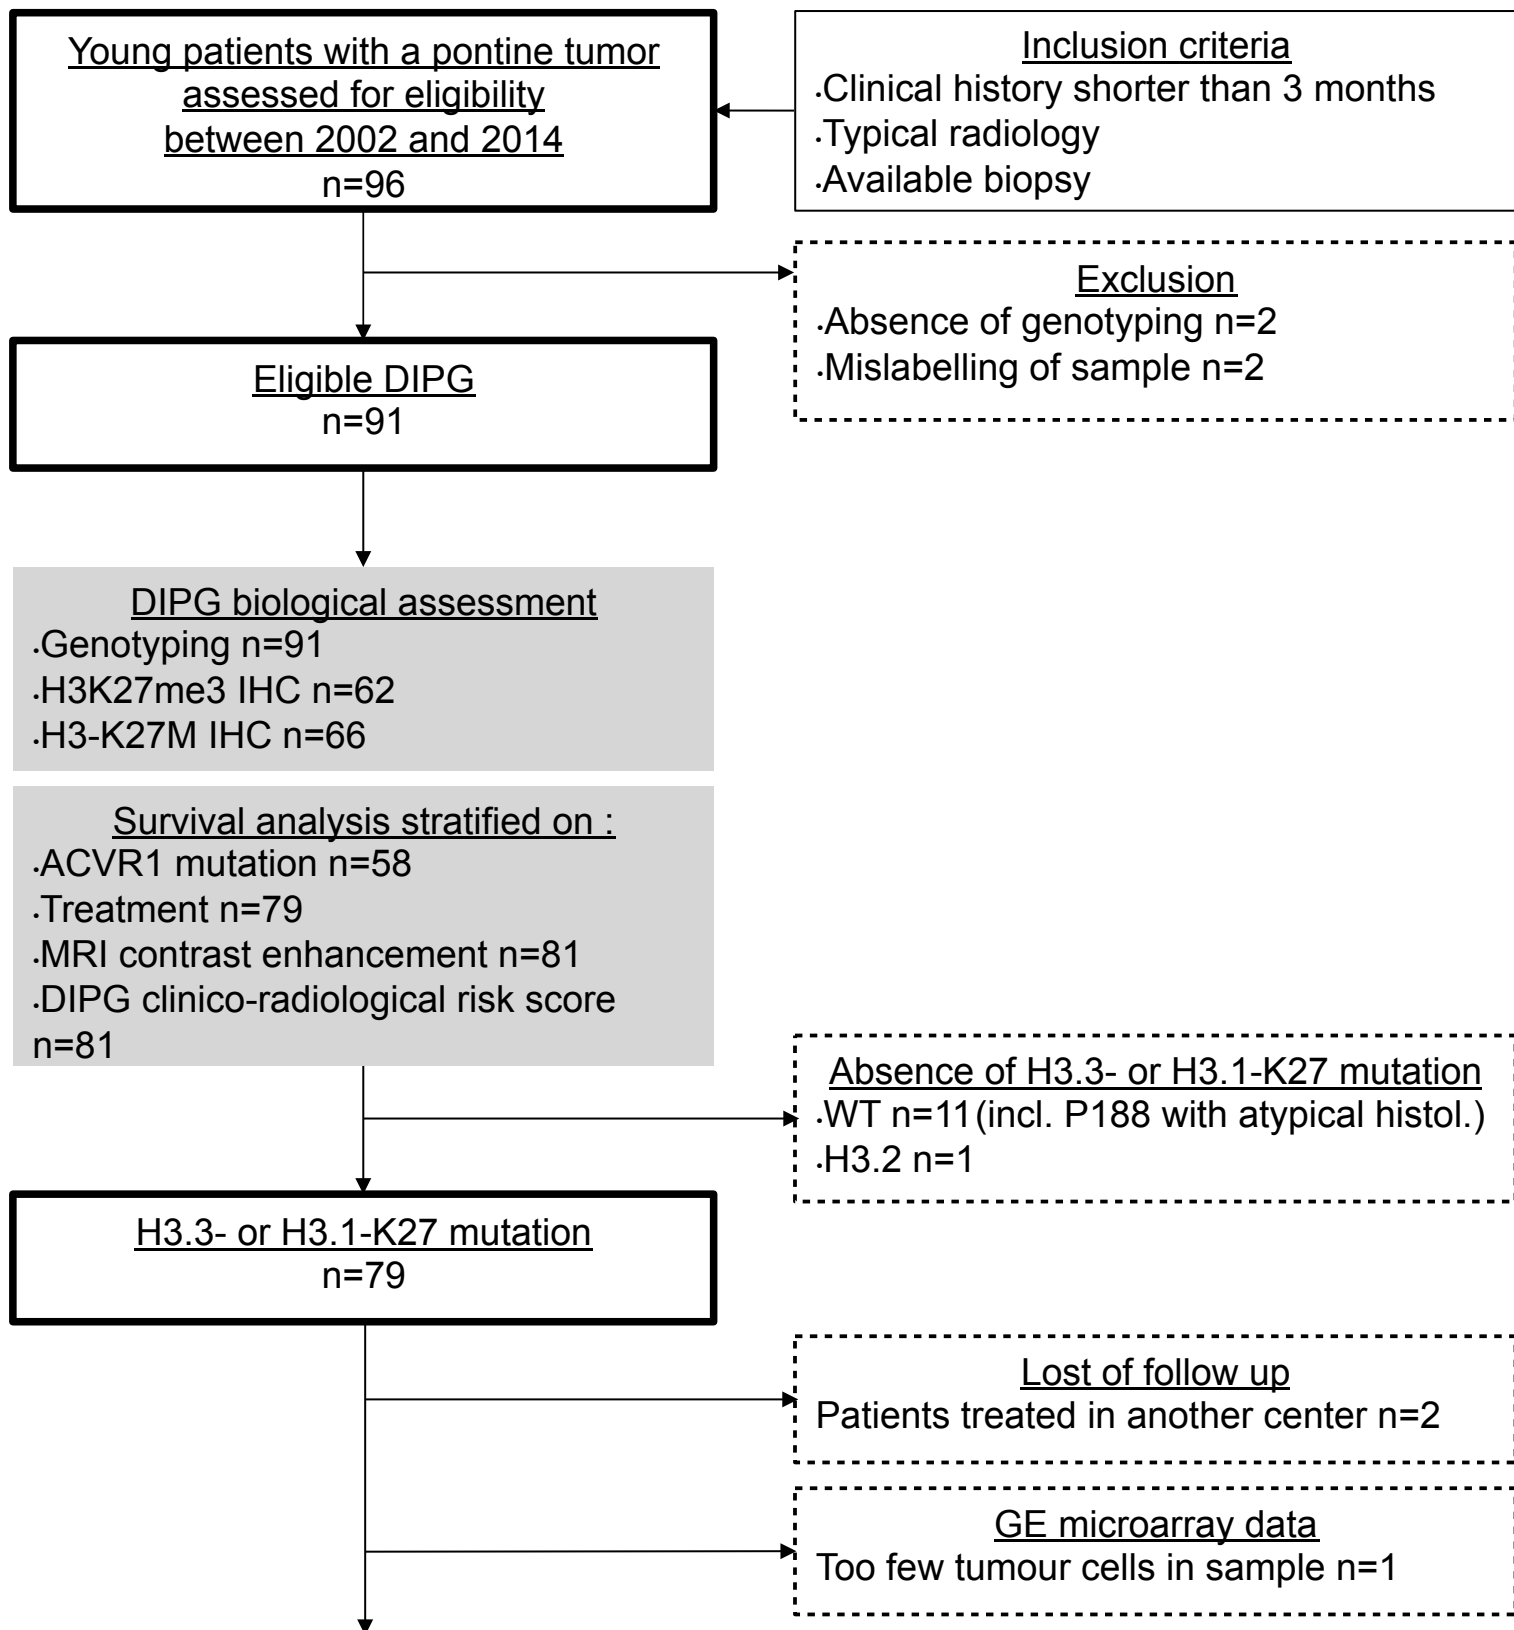

|                               |      |                               |      |
|-------------------------------|------|-------------------------------|------|
| .GE                           | n=39 | .Diffusion weighted MRI       | n=20 |
| .CGH                          | n=38 | .Sex ratio                    | n=79 |
| .TP53 accumulation            | n=57 | .Age at diagnosis             | n=79 |
| .ACVR1 genotyping             | n=53 | .Response to radiotherapy     | n=67 |
| .Metastasis                   | n=41 | .OS                           | n=77 |
| .Histological oedema analysis | n=57 | .MRI contrast enhancement     | n=72 |
| .Multivariate analysis        | n=69 | .Tumour Phenotype (Histology) | n=51 |
