# Supplementary material for: Histone H3F3A and HIST1H3B K27M mutations define two subgroups of diffuse intrinsic pontine gliomas with different prognosis and phenotypes
Source: Springer Nature journal article supplement (doi:10.1007/s00401-015-1478-0), 2015-09-23

a

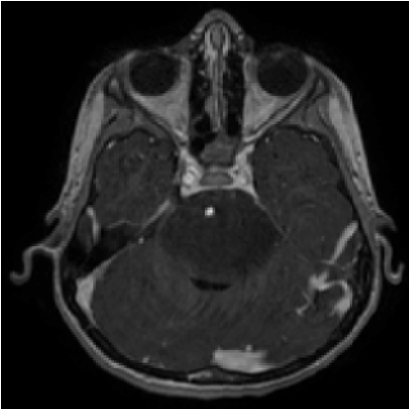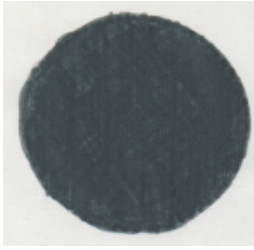

b

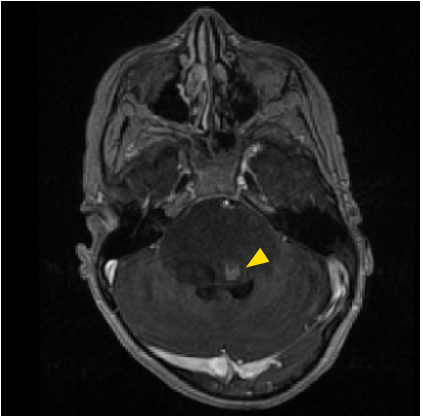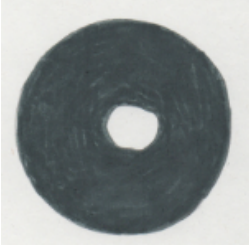

c

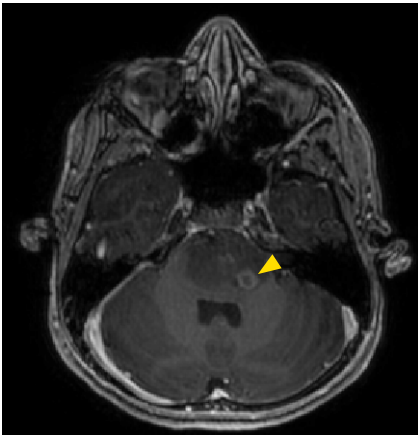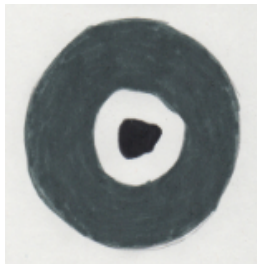

d

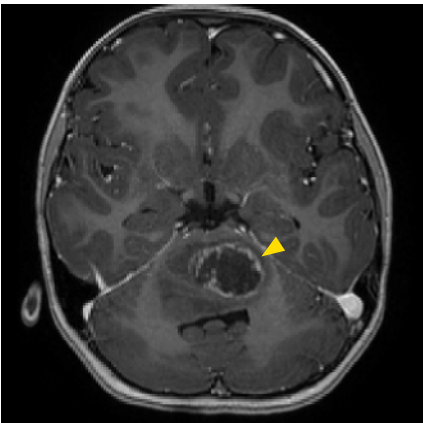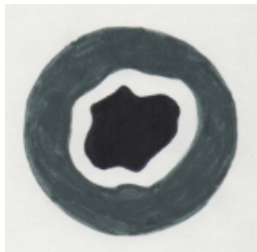

Supplement: MOESM8 [file 8404974]
