# Supplementary material for: Histone H3F3A and HIST1H3B K27M mutations define two subgroups of diffuse intrinsic pontine gliomas with different prognosis and phenotypes
Source: Springer Nature journal article supplement (doi:10.1007/s00401-015-1478-0), 2015-09-23
Supplement: MOESM10 [file 8404974]

**Suppl. Table S2: PCR primers**

| <b>Primer name</b> | <b>Primer sequence (5' - 3')</b> |
|--------------------|----------------------------------|
| HIST1H3B_F         | GGGCAGGAGCCTCTCTTAAT             |
| HIST1H3B_R         | ACCAAGTAGGCCTCACAAGC             |
| Hist1H3C_F         | CTCATTGCAAATGGCTCGTA             |
| Hist1H3C_R         | CATGATGGTGACGCGTTTAG             |
| Hist2H3C_F         | TGGCCCGTACTAAGCAGACT             |
| Hist2H3C_R         | AGCGGTACAGCTTCTTCCAA             |
| H3F3A_V2_F         | GTGATCGTGGCAGGAAAAGT             |
| H3F3A_V2_R         | GGTTTCTTCACCCCTCCAGT             |
| H3F3A_V1_F         | GATTTTGGGTAGACGTAATCTTC          |
| H3F3A_V1_R         | TTTCCTGTTATCCATCTTTTTGTT         |
| ACVR1-gen-R206-F   | TCAGGAAGTGGCTCTGGTCT             |
| ACVR1-gen-R206-R   | CAAGTTCAGGTGCTCCAACA             |
| ACVR1-gen-R258-F   | AAGGCAGGTATGGTGAGGTG             |
| ACVR1-gen-R258-R   | CCAAAACGGAGAGAGCAAAG             |
| ACVR1-gen-G328-F   | GCCTTCGAATAGTGCTGTCC             |
| ACVR1-gen-G328-R   | AACATGTTGTGGGGGAGAGA             |
| ACVR1-gen-G356-F   | AGGTAGCCTAGCGGGAGAAG             |
| ACVR1-gen-G356-R   | CGGCCAGATCGATTTACAAG             |

Suppl. Table S3: List of differentially expressed genes.

| Official Gene Symbol | H3.1/ H3.3 ratio | Adjusted <i>p</i> -value |
|----------------------|------------------|--------------------------|
| <b>HOXD8</b>         | <b>18.17</b>     | <b>1.56E-07</b>          |
| <b>TLX2</b>          | <b>11.98</b>     | <b>9.19E-05</b>          |
| ANGPTL4              | 5.89             | 1.18E-02                 |
| ADM                  | 5.85             | 1.18E-02                 |
| SLC30A3              | 5.83             | 3.41E-02                 |
| <b>BNC1</b>          | <b>4.31</b>      | <b>1.99E-07</b>          |
| TBX1                 | 3.73             | 2.48E-02                 |
| NGFR                 | 3.64             | 1.97E-02                 |
| IFITM4P              | 3.61             | 2.48E-02                 |
| IFITM2               | 3.58             | 1.18E-02                 |
| IFITM3               | 3.55             | 2.42E-02                 |
| EGFLAM               | 2.58             | 1.89E-02                 |
| FRZB                 | 2.46             | 2.48E-02                 |
| <b>FGF11</b>         | <b>2.40</b>      | <b>1.49E-03</b>          |
| <b>IRX4</b>          | <b>2.37</b>      | <b>2.21E-03</b>          |
| LDHA                 | 2.31             | 2.06E-02                 |
| <b>PMAIP1</b>        | <b>2.31</b>      | <b>4.06E-03</b>          |
| MRAP                 | 2.25             | 2.42E-02                 |
| CD14                 | 2.21             | 3.30E-02                 |
| <b>LSP1</b>          | <b>2.17</b>      | <b>9.97E-03</b>          |
| ITGA6                | 2.13             | 3.99E-02                 |
| SLC40A1              | 2.06             | 3.81E-02                 |
| GPR116               | 2.05             | 3.33E-02                 |
| ITPKB                | 2.05             | 2.96E-02                 |
| PYGL                 | 2.05             | 3.47E-02                 |
| FOLR2                | 2.03             | 3.75E-02                 |
| CDKN1A               | 2.01             | 4.04E-02                 |
| <b>PRRX1</b>         | <b>2.00</b>      | <b>3.20E-03</b>          |
| ERO1L                | 2.00             | 1.18E-02                 |
| SLC16A4              | 1.99             | 1.39E-02                 |
| <b>DDB2</b>          | <b>1.97</b>      | <b>2.89E-03</b>          |
| C1orf54              | 1.93             | 1.30E-02                 |
| STAB1                | 1.92             | 1.50E-02                 |
| <b>HK2</b>           | <b>1.92</b>      | <b>7.94E-03</b>          |
| FADS2                | 1.90             | 4.49E-02                 |
| SHC1                 | 1.89             | 2.25E-02                 |
| LRRC17               | 1.82             | 4.04E-02                 |
| PLXND1               | 1.80             | 3.54E-02                 |
| TNS1                 | 1.79             | 2.48E-02                 |
| CACNA2D4             | 1.79             | 3.77E-02                 |

|               |             |                 |
|---------------|-------------|-----------------|
| ITGA1         | 1.79        | 2.96E-02        |
| EPAS1         | 1.76        | 3.30E-02        |
| <b>RGL3</b>   | <b>1.76</b> | <b>1.49E-03</b> |
| RAB7L1        | 1.75        | 1.93E-02        |
| ANO7          | 1.73        | 1.67E-02        |
| PPP1R3B       | 1.71        | 3.87E-02        |
| CLEC1A        | 1.71        | 1.63E-02        |
| PDK1          | 1.67        | 4.20E-02        |
| SLC27A3       | 1.66        | 4.24E-02        |
| RHOB          | 1.65        | 2.48E-02        |
| NOSTRIN       | 1.65        | 3.33E-02        |
| INSIG2        | 1.63        | 4.04E-02        |
| MSC           | 1.63        | 1.46E-02        |
| FRMD6         | 1.61        | 3.45E-02        |
| <b>FDXR</b>   | <b>1.60</b> | <b>4.06E-03</b> |
| EDA2R         | 1.60        | 2.17E-02        |
| MYO10         | 1.58        | 2.86E-02        |
| <b>GABPB2</b> | <b>1.58</b> | <b>7.94E-03</b> |
| <b>ABHD1</b>  | <b>1.57</b> | <b>7.08E-03</b> |
| FAM57A        | 1.54        | 3.86E-02        |
| PDIA6         | 1.53        | 3.30E-02        |
| AEN           | 1.48        | 2.96E-02        |
| TPR           | 1.47        | 1.93E-02        |
| FLVCR2        | 1.47        | 1.67E-02        |
| ZNF366        | 1.47        | 2.96E-02        |
| <b>AP1S3</b>  | <b>1.44</b> | <b>9.74E-03</b> |
| DERL2         | 1.42        | 3.47E-02        |
| ITGA10        | 1.41        | 4.13E-02        |
| ELP5          | 1.40        | 2.48E-02        |
| DSP           | 1.38        | 3.27E-02        |
| EGLN1         | 1.37        | 2.24E-02        |
| STARD13       | 1.36        | 3.01E-02        |
| TOR1AIP2      | 1.31        | 2.61E-02        |
| BLZF1         | 1.30        | 1.74E-02        |
| DMBX1         | 1.27        | 2.96E-02        |
| MSLN          | 1.23        | 3.27E-02        |
| ANKFY1        | 1.22        | 2.68E-02        |
| IL6R          | 1.21        | 2.48E-02        |
| ALX1          | 1.18        | 4.12E-02        |
| GRIK3         | 0.82        | 4.49E-02        |
| CMPK1         | 0.81        | 4.37E-02        |
| XCR1          | 0.77        | 3.45E-02        |
| HTT           | 0.76        | 3.01E-02        |
| MEAF6         | 0.74        | 2.18E-02        |
| BCORL1        | 0.74        | 2.96E-02        |
| KCNA3         | 0.74        | 1.47E-02        |

|                |             |                 |
|----------------|-------------|-----------------|
| CROCC          | 0.73        | 2.06E-02        |
| ZP3            | 0.73        | 4.65E-02        |
| NUDT10         | 0.73        | 2.48E-02        |
| RCC2           | 0.71        | 3.07E-02        |
| ATAD3A         | 0.70        | 4.04E-02        |
| ZNRF1          | 0.70        | 4.32E-02        |
| MGAT5B         | 0.70        | 4.04E-02        |
| CDK5R1         | 0.70        | 2.85E-02        |
| CCDC158        | 0.69        | 3.30E-02        |
| <b>TMEM240</b> | <b>0.68</b> | <b>4.57E-03</b> |
| KCNG3          | 0.68        | 1.18E-02        |
| RAB9B          | 0.67        | 3.30E-02        |
| PCDH11X        | 0.67        | 3.63E-02        |
| TCEB2          | 0.67        | 1.89E-02        |
| HPCA           | 0.66        | 3.87E-02        |
| NUDT11         | 0.66        | 4.04E-02        |
| TMEM132B       | 0.66        | 2.96E-02        |
| ELAVL3         | 0.66        | 4.93E-02        |
| DES            | 0.64        | 3.33E-02        |
| PRDM8          | 0.64        | 4.37E-02        |
| AMER1          | 0.63        | 4.49E-02        |
| TLE4           | 0.63        | 3.45E-02        |
| ZSCAN1         | 0.62        | 2.48E-02        |
| WFIKKN1        | 0.61        | 4.37E-02        |
| CTNNBIP1       | 0.61        | 2.48E-02        |
| <b>MEF2B</b>   | <b>0.60</b> | <b>3.20E-03</b> |
| CBX8           | 0.60        | 4.98E-02        |
| PRKCZ          | 0.59        | 2.48E-02        |
| PCYT1B         | 0.59        | 2.82E-02        |
| TRPC3          | 0.59        | 4.04E-02        |
| CACNA1A        | 0.58        | 1.10E-02        |
| PPM1E          | 0.58        | 2.48E-02        |
| SBK1           | 0.58        | 1.38E-02        |
| GLT1D1         | 0.58        | 2.96E-02        |
| FAM131B        | 0.58        | 3.09E-02        |
| PCSK1N         | 0.57        | 2.68E-02        |
| C2orf74        | 0.57        | 4.37E-02        |
| <b>DLG3</b>    | <b>0.57</b> | <b>3.20E-03</b> |
| ZCCHC12        | 0.57        | 2.93E-02        |
| WFDC2          | 0.56        | 1.04E-02        |
| FAM184B        | 0.54        | 2.48E-02        |
| SYT14          | 0.54        | 1.66E-02        |
| KCNMB2         | 0.54        | 2.48E-02        |
| SHISA9         | 0.53        | 4.04E-02        |
| LRRC73         | 0.52        | 3.54E-02        |
| ASIC1          | 0.52        | 2.42E-02        |

|                 |             |                 |
|-----------------|-------------|-----------------|
| FBL1            | 0.52        | 3.01E-02        |
| <b>ADAMTS17</b> | <b>0.52</b> | <b>7.90E-04</b> |
| DLGAP3          | 0.50        | 3.54E-02        |
| IRX5            | 0.49        | 2.06E-02        |
| CAMTA1          | 0.49        | 2.85E-02        |
| <b>CAMK2N2</b>  | <b>0.48</b> | <b>1.49E-03</b> |
| CACNG1          | 0.47        | 3.54E-02        |
| RPRM            | 0.47        | 4.12E-02        |
| RIMS2           | 0.46        | 1.93E-02        |
| PDGFRA          | 0.43        | 2.25E-02        |
| HS6ST2          | 0.43        | 4.61E-02        |
| CA10            | 0.42        | 2.42E-02        |
| PCDH11Y         | 0.42        | 3.41E-02        |
| TMEFF2          | 0.42        | 3.54E-02        |
| ATCAY           | 0.41        | 1.18E-02        |
| SLC35F3         | 0.40        | 2.48E-02        |
| CHRDL1          | 0.38        | 3.69E-02        |
| WNT6            | 0.38        | 2.25E-02        |
| CNGA3           | 0.37        | 1.13E-02        |
| <b>CMYA5</b>    | <b>0.37</b> | <b>1.32E-03</b> |
| KLRC1           | 0.33        | 4.84E-02        |
| SPHKAP          | 0.32        | 3.38E-02        |
| NPM2            | 0.29        | 3.27E-02        |
| <b>TSPYL5</b>   | <b>0.29</b> | <b>4.03E-03</b> |
| MGARP           | 0.28        | 3.54E-02        |
| MOXD1           | 0.27        | 2.96E-02        |
| ARHGEF5         | 0.27        | 1.93E-02        |
| <b>MAB21L1</b>  | <b>0.24</b> | <b>1.32E-03</b> |

---
